# Supplementary material for: Effects of Bifidobacterium animalis Subsp. lactis (BPL1) Supplementation in Children and Adolescents with Prader–Willi Syndrome: A Randomized Crossover Trial
Source: MDPI journal article supplement (doi:10.3390/nu12103123), 2020-10-13
Supplement: s1 [file s1]

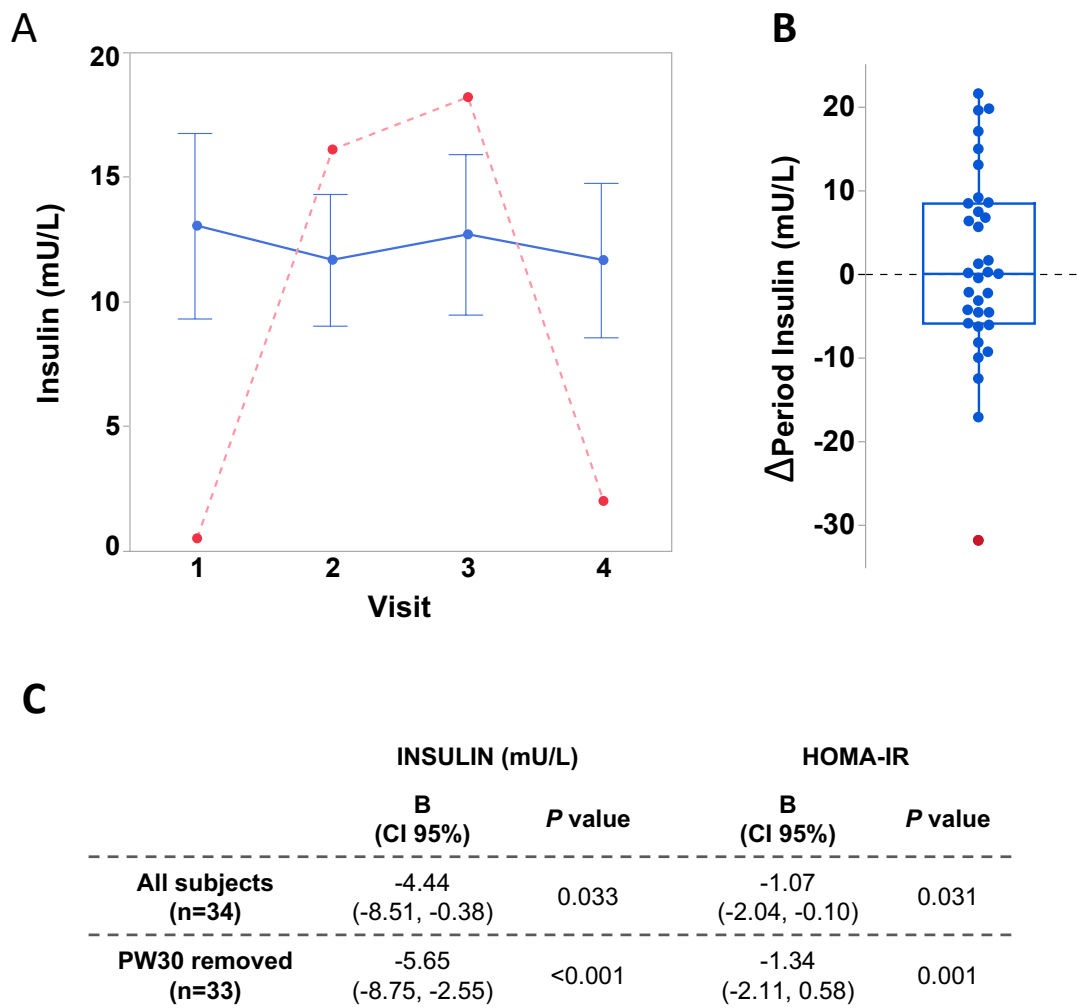

**Supplemental Figure S1. Fasting insulin levels and change between periods.**

**A)** Fasting insulin levels at all visits are shown as average (blue) and for subject PW30 (red). **B)** Difference of insulin levels between periods (Period 2-Period 1) was calculated; box plot shows median and interquartile range. **C)** Generalized linear regression was applied to assess treatment effects (sequence as independent variable) on insulin levels and HOMA-IR (dependent variables), adjusting for sex, age, genotype and basal fat mass; regression outcomes for “All subjects” are identical to values shown in Table 3 and are reproduced here for effect comparison to “PW30 removed”. This patient is an 11-years-old female with basal BMI-SDS of -0.23; furthermore, she was born at 28 weeks of gestational age, being considered very preterm.

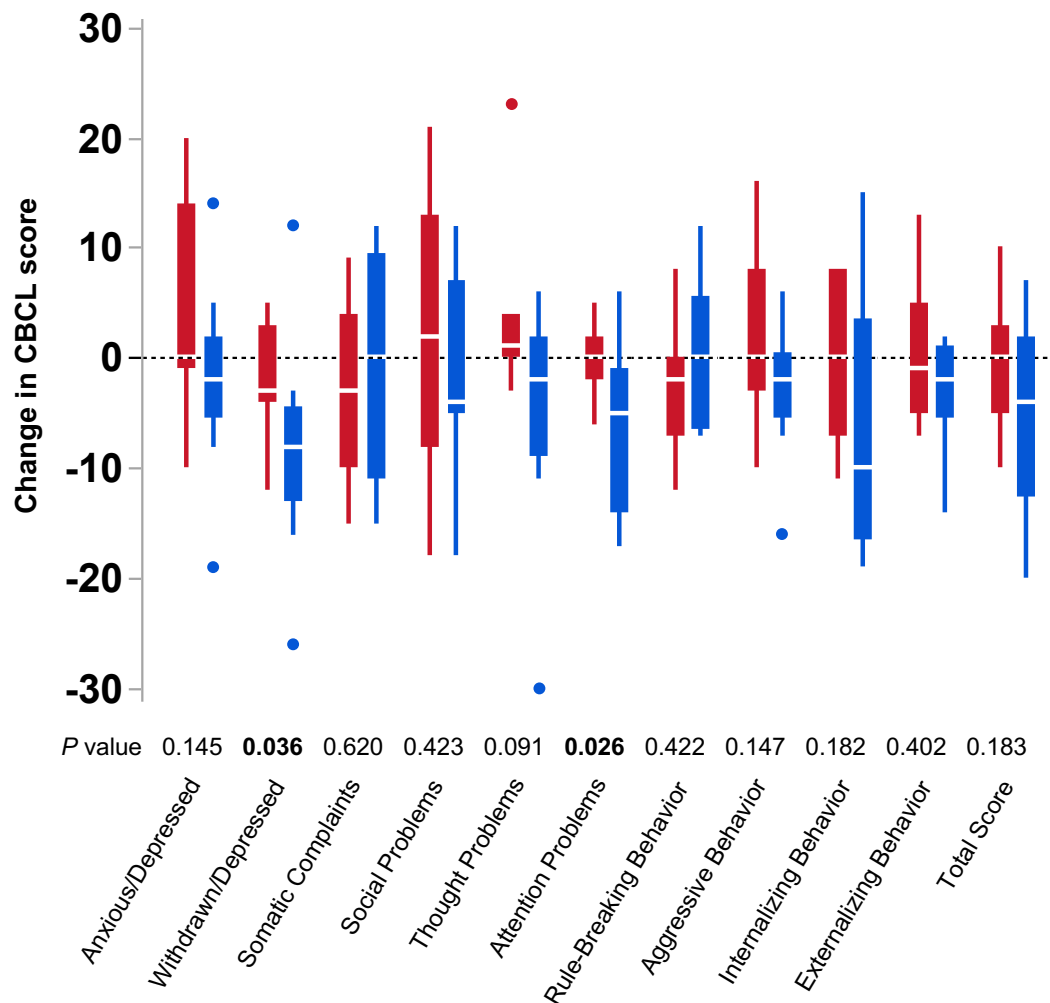

### Supplemental Figure S2. Treatment effect on behavior by genotype.

Differences between BPL1 and placebo periods in CBCL scores ( $P_{BPL1} - P_{Probiotic}$ ) for the indicated behavioral aspects are shown for subjects with deletion ( $n=11$ , red) or maternal disomy ( $n=9$ , blue). A change of 0 indicates no difference between BPL1 and placebo, and negative values indicate improvements with BPL1 versus placebo. Box plot shows median and interquartile range, with outliers (values above or below median  $\pm 1.5$  interquartile range are shown as red or blue circle. Differences between genotypes was assessed with the Wilcoxon test for each subscale.

**Supplemental Table S1. Fold change of bacterial species during placebo and BPL1 treatment periods.**

*Supplemental table provided as a Microsoft Excel file.*

**Supplemental Table S2. Basal demographic and physiologic characteristics of participants older than 4.5 years of age.**

|                            | <b>All (n=28)</b> | <b>AB (n=14)</b> | <b>BA (n=14)</b> | <b>P value</b> |
|----------------------------|-------------------|------------------|------------------|----------------|
| Sex (female)               | 17 (61)           | 10 (71)          | 7 (50)           | 0.243          |
| Genotype (deletions)       | 15 (54)           | 9 (64)           | 6 (43)           | 0.254          |
| Growth hormone use         | 27 (96)           | 14 (100)         | 13 (93)          | 0.233          |
| Metformin use              | 8 (29)            | 6 (43)           | 2 (14)           | 0.089          |
| Age (years)                | 12.1 (4)          | 12.1 (4.3)       | 12.1 (3.9)       | 0.969          |
| Weight (kg)                | 55 (24.9)         | 56.1 (22)        | 53.9 (28.4)      | 0.825          |
| Height (cm)                | 147.8 (17.7)      | 148.9 (18.3)     | 146.7 (17.7)     | 0.741          |
| BMI-SDS                    | 1.57 (1.34)       | 1.75 (1.18)      | 1.39 (1.51)      | 0.478          |
| Body fat mass (g)          | 24437 (15321)     | 24523 (12598)    | 24350 (18133)    | 0.977          |
| Body fat mass (%)          | 43.5 (8.5)        | 43.6 (7.7)       | 43.4 (9.5)       | 0.950          |
| Abdominal fat mass (g)     | 1767 (1422)       | 1764 (1181)      | 1770 (1675)      | 0.992          |
| Abdominal fat mass (%)     | 6.5 (1.7)         | 6.5 (1.9)        | 6.5 (1.5)        | 0.928          |
| HQ-CT (Score)              | 6.4 (6)           | 6.7 (6.7)        | 6.1 (5.4)        | 0.806          |
| Daily energy intake (kcal) | 1585 (361)        | 1581 (431)       | 1588 (292)       | 0.962          |
| Systolic pressure (mmHg)   | 111.6 (10.9)      | 111.9 (11.2)     | 111.4 (11)       | 0.906          |
| Diastolic pressure (mmHg)  | 71.8 (8.5)        | 71.1 (8.7)       | 72.6 (8.6)       | 0.649          |
| Triglycerides (mg/dl)      | 72 (26)           | 69 (23)          | 76 (28)          | 0.468          |
| Total cholesterol (mg/dl)  | 170 (38)          | 177 (41)         | 162 (34)         | 0.306          |
| LDL-cholesterol (mg/dl)    | 102 (32)          | 107 (34)         | 96 (31)          | 0.391          |
| HDL-cholesterol (mg/dl)    | 57 (14)           | 57 (13)          | 57 (15)          | 0.883          |
| Glucose (mg/dl)            | 87 (9)            | 84 (8)           | 90 (10)          | 0.077          |
| HbA1c (%)                  | 5.3 (0.2)         | 5.2 (0.1)        | 5.3 (0.3)        | 0.686          |
| Insulin (mU/L)             | 13 (9.6)          | 12.2 (9.6)       | 13.9 (9.9)       | 0.640          |
| HOMA-IR                    | 2.91 (2.27)       | 2.63 (2.19)      | 3.19 (2.4)       | 0.527          |

Data are shown as mean and standard deviation (SD) for continuous variables and n and percentage (%) for categorical variables. Group differences were assessed with Student's t-test (continuous variables) or Chi-square test (categorical variables). HQ-CT, hyperphagia questionnaire for clinical trials; BMI, body mass index; BMI-SDS, body mass index standard deviation score; LDL, low-density lipoprotein; HDL, high-density lipoprotein; HOMA-IR, homeostatic model assessment of insulin resistance.

**Supplemental Table S3. Absolute values of total body and abdominal fat mass at all visits.**

|                                           | Sequence AB   |               |               |               | Sequence BA   |               |               |               |
|-------------------------------------------|---------------|---------------|---------------|---------------|---------------|---------------|---------------|---------------|
|                                           | Placebo       | Probiotic     |               |               | Probiotic     | Placebo       |               |               |
|                                           | Visit 1       | Visit 2       | Visit 3       | Visit 4       | Visit 1       | Visit 2       | Visit 3       | Visit 4       |
| <b>Adiposity</b>                          |               |               |               |               |               |               |               |               |
| <b>All subjects (n=35)</b>                |               |               |               |               |               |               |               |               |
| Body fat (g)                              | 20037 (14017) | 20111 (13734) | 21104 (13978) | 21162 (13883) | 20743 (18213) | 20901 (18654) | 21711 (19684) | 22335 (19321) |
| Body fat (%)                              | 40.5 (9.7)    | 40.0 (9.4)    | 40.7 (9.6)    | 39.5 (9.3)    | 41.1 (10.0)   | 40.8 (10)     | 41.2 (10.1)   | 40.7 (9.4)    |
| Abdominal fat (g)                         | 1408 (1240)   | 1390 (1144)   | 1488 (1196)   | 1460 (1177)   | 1491 (1632)   | 1443 (1606)   | 1531 (1690)   | 1600 (1758)   |
| <b>Subjects &gt; 4.5 years-old (n=28)</b> |               |               |               |               |               |               |               |               |
| Body fat (g)                              | 24523 (12598) | 24583 (12203) | 25734 (12270) | 25761 (12187) | 24350 (18133) | 24371 (18834) | 25267 (19985) | 25756 (19690) |
| Body fat (%)                              | 43.6 (7.7)    | 43.1 (7.2)    | 44.0 (7.0)    | 42.4 (7.3)    | 43.4 (9.5)    | 42.3 (10.3)   | 42.6 (10.6)   | 41.6 (10.1)   |
| Abdominal fat (g)                         | 1764 (1181)   | 1738 (1060)   | 1852 (1105)   | 1813 (1097)   | 1770 (1675)   | 1698 (1667)   | 1792 (1760)   | 1863 (1838)   |
| Abdominal fat (%)                         | 6.5 (1.9)     | 6.6 (1.6)     | 6.8 (1.4)     | 6.6 (1.5)     | 6.5 (1.5)     | 6.2 (1.4)     | 6.3 (1.4)     | 6.4 (1.5)     |
| <b>Insulin sensitivity</b>                |               |               |               |               |               |               |               |               |
| Insulin (mU/L)                            | 9.9 (9.5)     | 10.3 (7.9)    | 11.6 (10.1)   | 9.6 (8.3)     | 12.7 (9.9)    | 9.9 (6.3)     | 10.0 (6.7)    | 11.9 (7.1)    |
| HOMA-IR                                   | 2.14 (2.15)   | 2.19 (1.70)   | 2.60 (2.49)   | 2.08 (1.92)   | 2.89 (2.38)   | 2.19 (1.46)   | 2.19 (1.54)   | 2.63 (1.64)   |

Data are shown as mean (SD) at each visit from all subjects (n=35) or subjects older than 4.5 years of age (n=28). HOMA-IR, homeostatic model assessment of insulin resistance

**Supplemental Table S4. Period effects on hyperphagia and physiologic outcomes.**

|                           | Period effect         |         |
|---------------------------|-----------------------|---------|
|                           | B (95% CI)            | P value |
| Body fat mass (g)         | 160 (-531, 852)       | 0.639   |
| Body fat mass (%)         | -0.51 (-1.37, 0.34)   | 0.232   |
| Abdominal fat mass (g)    | 43 (-33, 120)         | 0.258   |
| Abdominal fat mass (%)    | 0.02 (-0.30, 0.34)    | 0.877   |
| HQ-CT (Score)             | -1.22 (-3.25, 0.81)   | 0.227   |
| Energy intake (kcal/day)  | -95 (-230, 40)        | 0.161   |
| Systolic pressure (mmHg)  | -2.00 (-7.96, 3.97)   | 0.495   |
| Diastolic pressure (mmHg) | -0.07 (-6.34, 6.21)   | 0.983   |
| Triglycerides (mg/dl)     | -1.90 (-17.05, 13.24) | 0.799   |
| Total cholesterol (mg/dl) | 0.28 (-10.61, 11.18)  | 0.958   |
| LDL-cholesterol (mg/dl)   | 2.15 (-6.37, 10.67)   | 0.610   |
| HDL-cholesterol (mg/dl)   | -0.76 (-5.13, 3.61)   | 0.725   |
| Glucose (mg/dl)           | -1.37 (-6.64, 3.90)   | 0.600   |
| HbA1c (%)                 | 0.07 (-0.01, 0.14)    | 0.075   |
| Insulin (mU/L)            | 1.16 (-2.78, 5.10)    | 0.552   |
| HOMA-IR                   | 0.24 (-0.7, 1.17)     | 0.612   |

Multivariate generalized linear regression was applied to estimate period effects (n=35). Model was adjusted for sex, age, genotype, and basal % body fat mass. HQ-CT, hyperphagia questionnaire for clinical trials; LDL, low-density lipoprotein; HDL, high-density lipoprotein; HOMA-IR, homeostatic model assessment of insulin resistance; B, effect size; CI, confidence interval. A  $P < 0.05$  was considered significant.

**Supplemental Table S5. Basal CBCL scores of participants.**

|                        | <b>All subjects<br/>(n=20)</b> | <b>Deletions<br/>(n=11)</b> | <b>Disomies<br/>(n=9)</b> | <b><i>P</i> value</b> |
|------------------------|--------------------------------|-----------------------------|---------------------------|-----------------------|
| Anxious/depressed      | 59.0 (8.7)                     | 59.9 (10.1)                 | 57.9 (6.9)                | 0.604                 |
| Withdrawn/depressed    | 61.5 (7.6)                     | 62.1 (8.9)                  | 60.7 (6.1)                | 0.679                 |
| Somatic complaints     | 61.4 (5.6)                     | 62.4 (3.7)                  | 60.2 (7.4)                | 0.444                 |
| Social problems        | 68.2 (9.4)                     | 70.2 (9.8)                  | 65.7 (8.8)                | 0.293                 |
| Thought problems       | 66.0 (9.0)                     | 68.0 (9.1)                  | 63.4 (8.7)                | 0.268                 |
| Attention problems     | 61.1 (5.2)                     | 61.1 (5.4)                  | 61.0 (5.2)                | 0.970                 |
| Rule-breaking behavior | 58.7 (6.2)                     | 60.9 (6.0)                  | 55.9 (5.5)                | 0.068                 |
| Aggressive behavior    | 63.6 (9.0)                     | 62.9 (8.4)                  | 64.3 (10.1)               | 0.740                 |
| Internalizing          | 61.7 (7.2)                     | 62.3 (7.8)                  | 60.9 (6.9)                | 0.678                 |
| Externalizing          | 61.5 (8.0)                     | 62.4 (7.1)                  | 60.3 (9.3)                | 0.597                 |
| Total score            | 65.1 (7.1)                     | 66.5 (6.8)                  | 63.4 (7.5)                | 0.365                 |

Data for the CBCL subscales as well as internalizing, externalizing, and total scores are shown as mean and standard deviation (SD). Group differences were assessed with Student's *t*-test. CBCL, Childhood Behavior Checklist.
